# Supplementary material
Source: publisher figshare collection journal article supplement (https://future-science-group.figshare.com/ndownloader/files/31570178)
Supplement: Supplementary file 1 [file 31570178]

**Supplementary Table 1. COX regression analysis of Gene mutation types and TKI drug types**

|  | ***Factors*** | ***β*** | ***SE*** | ***Wald*** | ***df*** | ***P-value*** | ***HR*** | ***95.0% CI*** | |
| --- | --- | --- | --- | --- | --- | --- | --- | --- | --- |
| ***lower*** | ***up*** |
| **Single-Factors** | Gene mutation type | -1.347 | 0.579 | 5.41 | 1 | 0.02 | 0.26 | 0.084 | 0.809 |
|  | TKIs |  |  | 9.115 | 4 | 0.058 |  |  |  |
|  | Type(1) | 1.222 | 34.384 | 0.001 | 1 | 0.972 | 3.395 | 0 | 6.29273E+29 |
|  | Type(2) | 2.838 | 34.386 | 0.007 | 1 | 0.934 | 17.085 | 0 | 3.1773E+30 |
|  | Type(3) | 3.515 | 34.385 | 0.01 | 1 | 0.919 | 33.6 | 0 | 6.2376E+30 |
|  | Type(4) | -10.118 | 137.528 | 0.005 | 1 | 0.941 | 0 | 0 | 4.672E+112 |
| **Multi-Factors** | Gene mutation type | -0.529 | 0.831 | 0.406 | 1 | 0.524 | 0.589 | 0.116 | 3.003 |
|  | TKIs |  |  | 5.936 | 4 | 0.204 |  |  |  |
|  | Type(1) | -0.818 | 1.202 | 0.463 | 1 | 0.496 | 0.441 | 0.042 | 4.652 |
|  | Type(2) | 0.722 | 1.114 | 0.42 | 1 | 0.517 | 2.058 | 0.232 | 18.271 |
|  | Type(3) | 1.096 | 0.863 | 1.612 | 1 | 0.204 | 2.992 | 0.551 | 16.247 |
|  | Type(4) | -13.156 | 283.481 | 0.002 | 1 | 0.963 | 0 | 0 | 3.852E+235 |
